# Supplementary material
Source: PubMed Central journal article supplement (PMC4773885)
Supplement: NIHMS67358-supplement-01.pdf [file NIHMS67358-supplement-01.pdf]

**Table S1. Relationship between dietary component intake and rs9939609 without removal of under-reporters (macronutrients)**

| Dietary Component               | Unit of measure (daily) | TT                         | AT                         | AA                         | n    | Per allele effect (SE) | p_lin  | p_nptrend | Per allele              |              |
|---------------------------------|-------------------------|----------------------------|----------------------------|----------------------------|------|------------------------|--------|-----------|-------------------------|--------------|
|                                 |                         |                            |                            |                            |      |                        |        |           | effect, BMI adjust (SE) | p_BMI_adjust |
| Total weight of all food        | g                       | 768.2<br>(766.2, 770.1)    | 778.5<br>(776.5, 780.4)    | 785.3<br>(783.3, 787.3)    | 5452 | 1.012<br>(0.005)       | 0.02   | 0.05      | 1.011<br>(0.005)        | 0.03         |
| Total energy of all foods eaten | kcal                    | 1574.8<br>(1572.8, 1576.8) | 1607.0<br>(1605.0, 1609.0) | 1625.6<br>(1623.6, 1627.5) | 5452 | 1.017<br>(0.004)       | <0.001 | 0.002     | 1.016<br>(0.004)        | <0.001       |
| Total Energy†                   | kcal                    | 1794.8<br>(1792.9, 1796.8) | 1824.7<br>(1822.7, 1826.6) | 1844.2<br>(1842.3, 1846.2) | 5452 | 1.014<br>(0.004)       | <0.001 | 0.008     | 1.014<br>(0.004)        | 0.001        |
| Protein                         | g                       | 59.34<br>(57.4, 61.3)      | 60.3<br>(58.3, 62.2)       | 60.8<br>(58.8, 62.78)      | 5452 | 1.013<br>(0.005)       | 0.01   | 0.06      | 1.010<br>(0.005)        | 0.04         |
| Fat                             | g                       | 71.8<br>(69.8, 73.8)       | 73.2<br>(71.2, 75.1)       | 74.1<br>(72.2, 76.1)       | 5452 | 1.017<br>(0.005)       | 0.001  | 0.006     | 1.016<br>(0.005)        | 0.002        |
| Saturated fat                   | g                       | 27.3<br>(25.3, 29.3)       | 27.9<br>(25.9, 29.8)       | 28.2<br>(26.2, 30.2)       | 5452 | 1.018<br>(0.007)       | 0.006  | 0.02      | 1.018<br>(0.007)        | 0.005        |
| Monounsaturated fat             | g                       | 24.5<br>(22.5, 26.5)       | 24.9<br>(23.0, 26.9)       | 25.2<br>(23.2, 27.1)       | 5452 | 1.014<br>(0.006)       | 0.01   | 0.03      | 1.013<br>(0.006)        | 0.02         |
| Polyunsaturated fat             | g                       | 11.4<br>(9.4, 13.4)        | 11.7<br>(9.7, 13.6)        | 11.8<br>(9.8, 13.8)        | 5452 | 1.019<br>(0.007)       | 0.01   | 0.009     | 1.017<br>(0.007)        | 0.02         |

|                                  |   |                         |                         |                          |      |                  |       |       |                  |       |
|----------------------------------|---|-------------------------|-------------------------|--------------------------|------|------------------|-------|-------|------------------|-------|
| Trans fatty acid                 | g | 2.4<br>(0.4, 4.4)       | 2.4<br>(0.5, 4.4)       | 2.5<br>(0.5, 4.5)        | 5452 | 1.018<br>(0.009) | 0.03  | 0.02  | 1.019<br>(0.009) | 0.02  |
| Dietary cholesterol              | g | 163.4<br>(161.4, 165.4) | 167.5<br>(165.5, 169.5) | 169.7<br>(167.8, 171.7)  | 5451 | 1.020<br>(0.010) | 0.03  | 0.06  | 1.017<br>(0.010) | 0.08  |
| Carbohydrate                     | g | 239.1<br>(237.2, 241.1) | 242.8<br>(240.9, 244.8) | 245.2<br>(243.2, 247.2)  | 5452 | 1.013<br>(0.004) | 0.003 | 0.01  | 1.014<br>(0.004) | 0.001 |
| Total sugar                      | g | 104.5<br>(102.5, 106.5) | 107.5<br>(105.5, 109.4) | 108.7<br>(106.7, 110.67) | 5452 | 1.022<br>(0.007) | 0.003 | 0.004 | 1.026<br>(0.008) | 0.001 |
| Starch                           | g | 127.0<br>(125.1, 129.0) | 128.2<br>(126.2, 130.1) | 129.1<br>(127.1, 131.0)  | 5452 | 1.001<br>(0.005) | 0.08  | 0.4   | 1.007<br>(0.005) | 0.1   |
| Non-starch Starch polysaccharide | g | 10.8<br>(8.9, 12.8)     | 10.9<br>(8.9, 12.8)     | 11.1<br>(9.1, 13.1)      | 5452 | 1.022<br>(0.006) | 0.1   | 0.1   | 1.011<br>(0.006) | 0.08  |

Mean values (95% CI) for macronutrients only adjusted for child sex at age 10-11. p<sub>lin</sub> represents p value from linear regression, p<sub>nptrend</sub> represents p value from non-parametric test for trend and p<sub>BMI\_adjust</sub> (and related effect estimates) represents that from linear regression adjusted for both sex and log<sub>10</sub>, zscored sex specific BMI. All effects are shown as beta values from linear regression of log<sub>10</sub> transformed variables and thus ratios of geometric means. † indicates total energy (kcal) including drinks.
